# Supplementary material
Source: Copernicus journal article supplement (doi:10.5194/egusphere-2026-3428)
Supplement: Supplementary file 1 [file egusphere-2026-3428-supplement.pdf]

1  
2  
3  
4  
5  
6  
7  
8  
9  
10  
11  
12  
13  
14  
15  
16  
17  
18  
19  
20  
21  
22  
23  
24  
25  
26  
27  
28  
29  
30  
31  
32  
33  
34  
35  
36

Supplementary information for

**Evaluating the EPICC-Model for Regional Air Quality**

**Simulation: A Comparative Study with CAMx and CMAQ**

**Mengjie Lou<sup>1</sup>, Qizhong Wu<sup>1</sup>, Wending Wang<sup>2,3,4</sup>, Huansheng Chen<sup>2,3,4</sup>, Kai Cao<sup>2</sup>, Xiaohan Fan<sup>5</sup>, Dingyue Liang<sup>5</sup>, Fenfen Yu<sup>5</sup>, Jiating Zhang<sup>1</sup>, Wei Wang<sup>6</sup>, Zifa Wang<sup>2,3,4</sup>**

<sup>1</sup>Institute of Earth System Science, Faculty of Geographical Science, Beijing Normal University, Beijing, 100875, China

<sup>2</sup>State Key Laboratory of Atmospheric Environment and Extreme Meteorology, Institute of Atmospheric Physics, Chinese Academy of Sciences, Beijing, 100029, China

<sup>3</sup>State Key Laboratory of Atmospheric Boundary Layer Physics and Atmospheric Chemistry, Institute of Atmospheric Physics, Chinese Academy of Sciences, Beijing, 100029, China

<sup>4</sup>University of Chinese Academy of Sciences, Beijing, 100049, China

<sup>5</sup>Clear Technology Co., Ltd., Beijing, 100029, China

<sup>6</sup>China National Environmental Monitoring Centre, Beijing, 100012, China

**Correspondence:** Qizhong Wu ([wqizhong@bnu.edu.cn](mailto:wqizhong@bnu.edu.cn)) and Wending Wang ([wangwending@mail.iap.ac.cn](mailto:wangwending@mail.iap.ac.cn))

**Contents of this file:**

**S1 Evaluation Metrics**

**S2 Evaluation of WRF Meteorological Field Simulations**

**S3 Distribution of 1,644 National Control Stations**

**S4 Air Quality Index (AQI) and Individual Air Quality Index (IAQI)**

**S5 Hit Rate, False Alarm Rate and the Distance from the Random Operating Characteristic (DROC)**

## S1 Evaluation Metrics

The evaluation metrics used in the model assessment include the correlation coefficient (R), the root mean square error (RMSE), the mean bias (MB), the normalized mean bias (NMB), the fraction of predictions within a factor of two of observations (FAC2), and the index of agreement (IOA). R represents the similarity in the temporal variation between predicted and observed values; RMSE quantifies the average magnitude of the difference between predictions and observations; MB indicates the average absolute difference between predictions and observations; NMB indicates the average relative bias of predictions compared to observations; FAC2 reflects the fraction of predictions that fall within a factor of two of the observations; IOA measures the degree of agreement between predictions and observations (Willmott, 1981). The calculation formulas are as follows:

$$R = \frac{\sum_{i=1}^n (M_i - \bar{M})(O_i - \bar{O})}{\sqrt{\sum_{i=1}^n (M_i - \bar{M})^2 \sum_{i=1}^n (O_i - \bar{O})^2}} \quad (S1)$$

$$RMSE = \sqrt{\frac{1}{n} \sum_{i=1}^n (M_i - O_i)^2} \quad (S2)$$

$$MB = \frac{1}{n} \sum_{i=1}^n (M_i - O_i) \quad (S3)$$

$$NMB = \frac{\sum_{i=1}^n (M_i - O_i)}{\sum_{i=1}^n O_i} \times 100\% \quad (S4)$$

$$FAC2 = \text{fraction of predictions satisfying } 0.5 \leq \frac{M_i}{O_i} \leq 2 \quad (S5)$$

$$IOA = 1 - \frac{\sum_{j=1}^n (P_j - Q_j)^2}{\sum_{j=1}^n (|P_j - \bar{Q}| + |Q_j - \bar{Q}|)^2} \quad (S6)$$

In the formula,  $M_i$  denotes the predicted value on day  $i$ ,  $O_i$  denotes the observed value on day  $i$ , and  $n$  represents the number of days with valid simultaneous model predictions and observations during the evaluation period.  $\bar{M}$  and  $\bar{O}$  are the mean predicted and observed values over the evaluated days, respectively. For the calculation of FAC2, a value of 1 is assigned if the criterion is met; otherwise, 0 is assigned. The sum of these binary results is then divided by  $n$  to obtain the FAC2 score. Here,  $P_j$  represents the simulated value at site  $j$ ,  $Q_j$  the observed value at site  $j$ ,  $\bar{Q}$  the mean observed value across all sites, and  $N$  the total number of sites. IOA ranges from 0 to 1, where values closer to 1 indicate higher spatial consistency between the model simulation and observations, while values closer to 0 indicate larger discrepancies.

## 66 S2 Evaluation of WRF Meteorological Field Simulations

### 67 S2.1 January

68 As shown in Fig. S1, the WRF model reproduced the diurnal variation of 2 m  
69 temperature in January 2021 reasonably well over most parts of China, with correlation  
70 coefficients (R) generally exceeding 0.7 except for parts of central China. In Northeast  
71 China, temperatures were generally underestimated (mean bias, MB, mostly -1 to -5 °C),  
72 with local RMSE values exceeding 6 °C. In North China, distinct north-south  
73 differences were observed: the northern part exhibited larger cold biases and stronger  
74 fluctuations (RMSE > 3 °C), whereas the southern part showed warm biases with  
75 smaller fluctuations (RMSE around 3-4 °C). The model performance was generally  
76 good in East and South China, except for cold biases in parts of Fujian and Zhejiang  
77 (MB = -1 to -3 °C, RMSE = 4-5 °C). In Northwest China, warm biases were more  
78 pronounced, with MB of 1-3 °C at most locations and exceeding 3 °C at some Xinjiang  
79 stations, while RMSE values were mostly above 5 °C. In Southwest China and the  
80 southern part of Central China, the model showed larger deviations, with the former  
81 generally underestimated (MB < -3 °C, RMSE > 5 °C) and the latter, such as in Hunan,  
82 exhibiting low correlations (R = 0.3-0.4) and RMSE exceeding 7 °C.

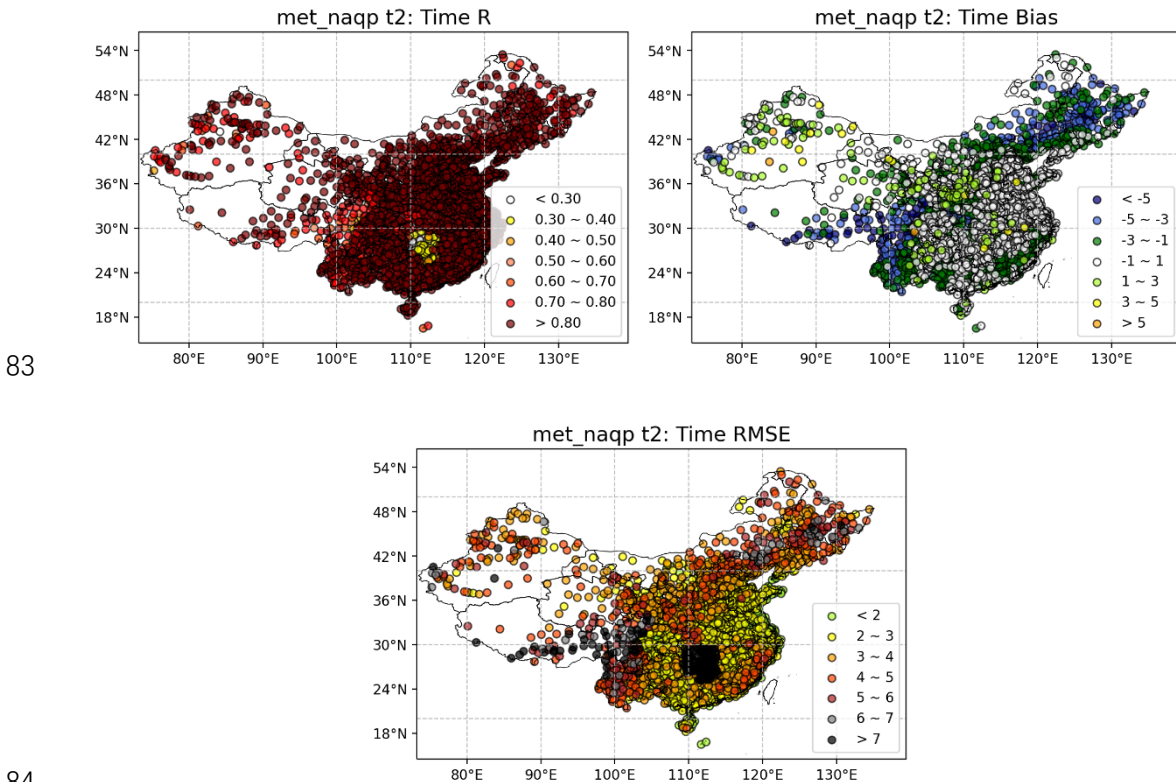

85 **Fig. S1** Spatial distribution of hourly evaluation metrics for 2 m air temperature simulated by the  
86 WRF model across China from 1 to 31 January 2021.

87 As shown in Fig. S2, the WRF model well reproduces the diurnal variations of 2 m  
88 relative humidity across most regions of China, with R generally exceeding 0.7. Overall,  
89 substantial overestimations are observed in southern North China (e.g., Shanxi) and  
90 Southwest China, with MB exceeding 15% and RMSE mostly above 23%. Additionally,

91 moderate overestimations with considerable variability are present at some stations in  
 92 Central China, South China, and parts of Northwest China.

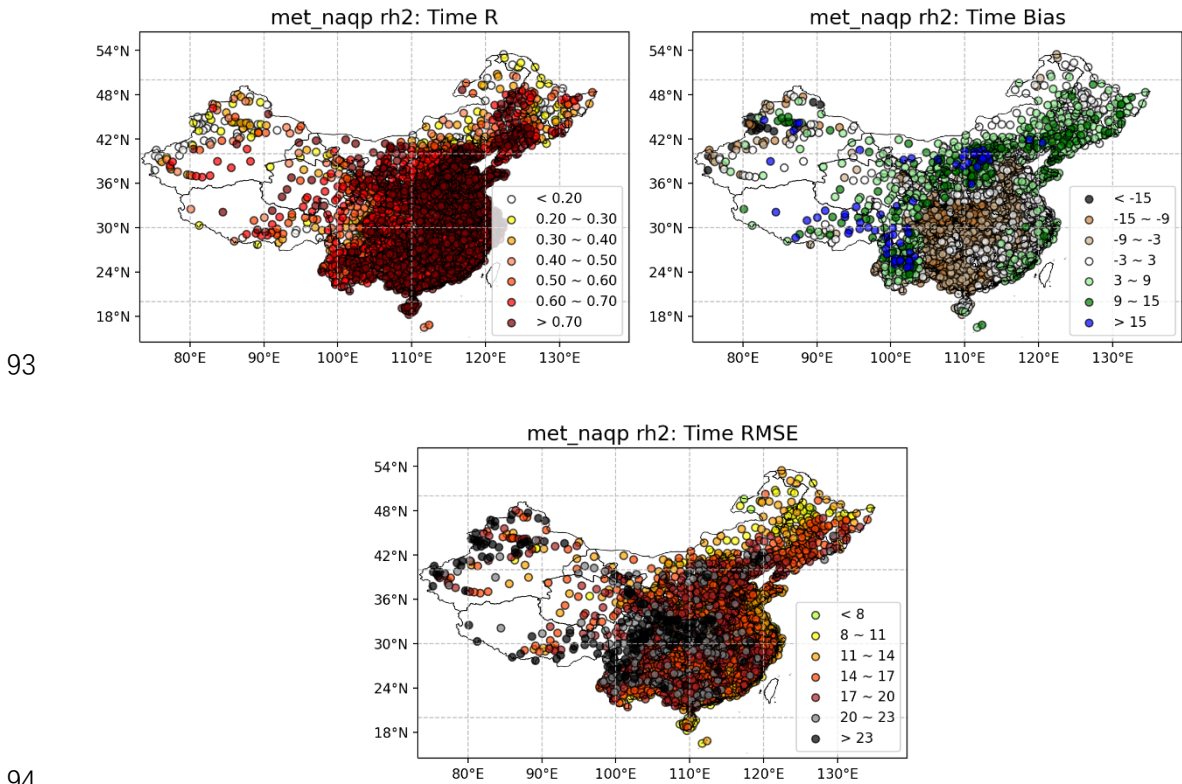

95 **Fig. S2** Spatial distribution of hourly evaluation metrics for 2 m relative humidity simulated by the  
 96 WRF model across China from 1 to 31 January 2021.

97 As shown in Fig. S3, the WRF model reproduces the diurnal variations of 10 m  
 98 wind speed well across most regions of China, except for the Sichuan Basin and  
 99 northwestern Xinjiang. The deviations are mainly characterized by overestimation,  
 100 with RMSE generally below 8 m/s, indicating relatively small fluctuations and good  
 101 overall consistency in wind speed simulations nationwide.

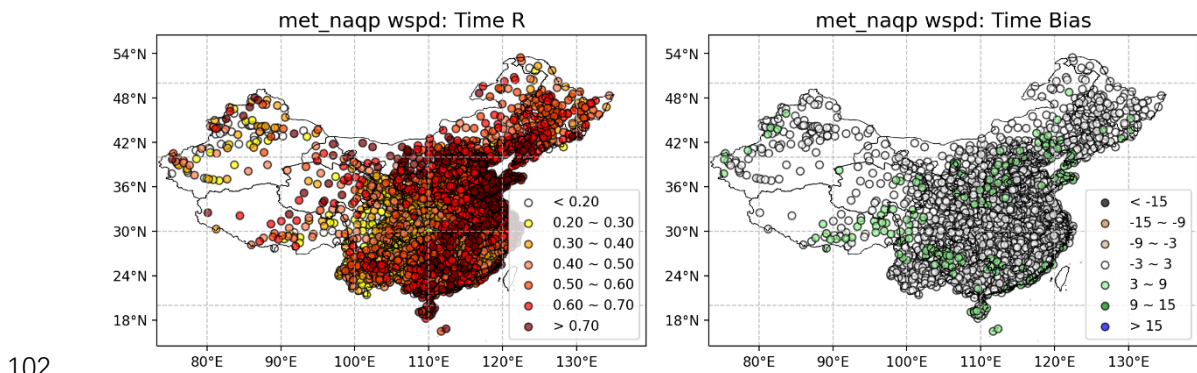

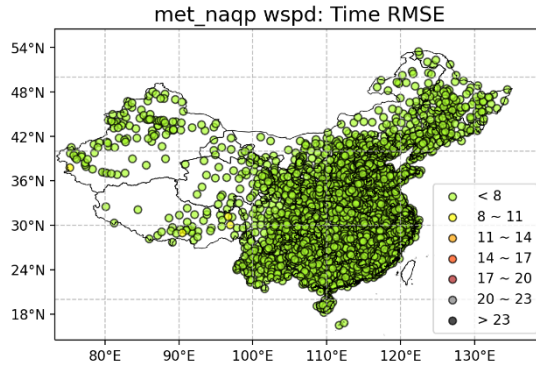

103

104 **Fig. S3** Spatial distribution of hourly evaluation metrics for 10 m wind speed simulated by the WRF  
 105 model across China from 1 to 31 January 2021.

106 As shown in Fig. S4, the WRF model exhibits overall poor performance in  
 107 simulating 10 m wind direction, with only a few stations showing satisfactory results.

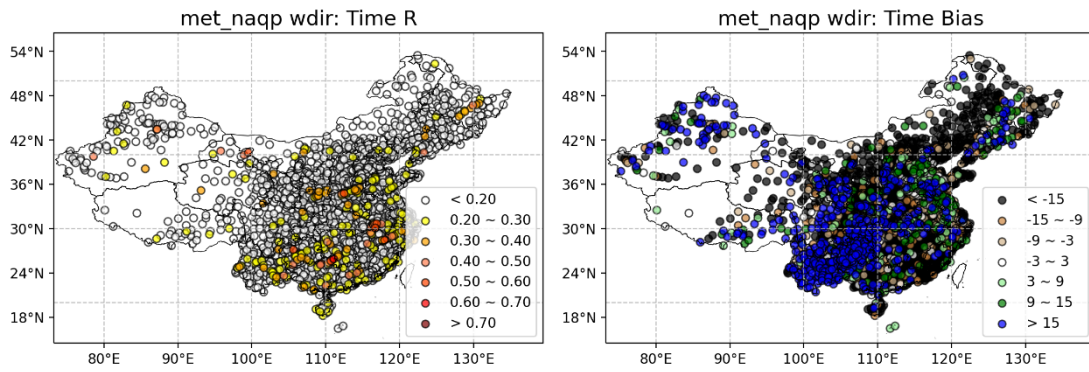

108

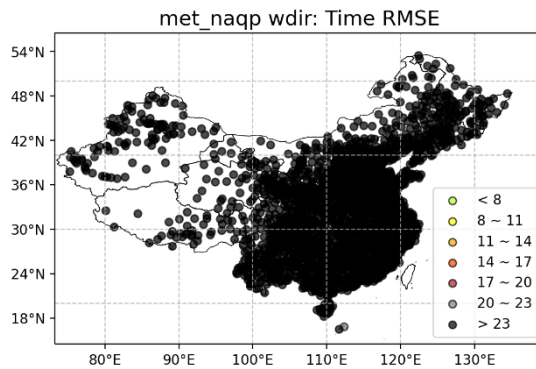

109

110 **Fig. S4** Spatial distribution of hourly evaluation metrics for 10 m wind direction simulated by the  
 111 WRF model across China from 1 to 31 January 2021.

112 As shown in Fig. S5, the WRF model reproduces the precipitation processes across  
 113 most regions of China in January 2021 reasonably well ( $R > 0.4$ ), although performance  
 114 was relatively poor in Southwest China.

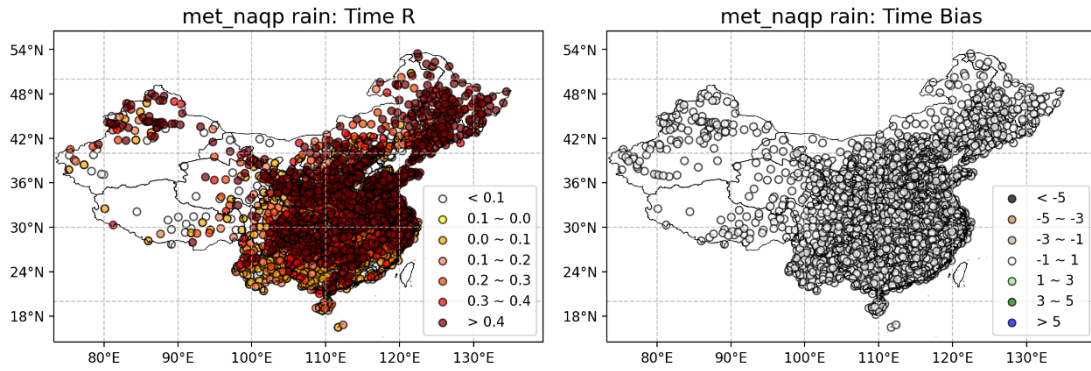

115

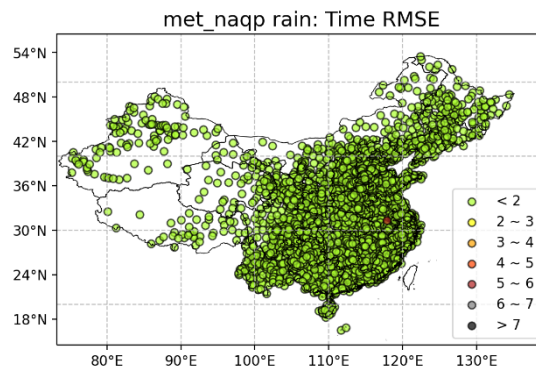

116

117 **Fig. S5** Spatial distribution of hourly evaluation metrics for precipitation simulated by the WRF  
 118 model across China from 1 to 31 January 2021.

119 As shown in Fig. S6, the WRF model reasonably reproduces the diurnal variations  
 120 of surface pressure across mainland China ( $R > 0.7$ ). Overall, simulations tended to  
 121 underestimate pressure with larger fluctuations in parts of Southwest and Central China,  
 122 with mean biases below 20 hPa, whereas slight overestimations were observed in  
 123 regions such as Guizhou and Chongqing.

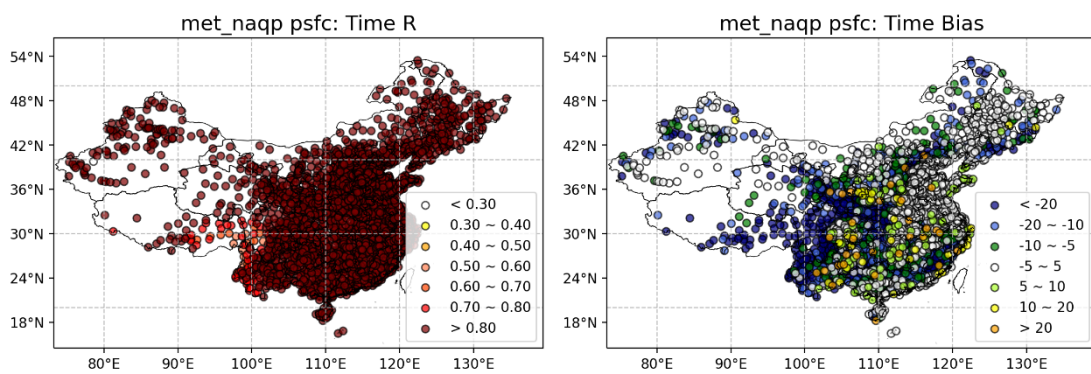

124

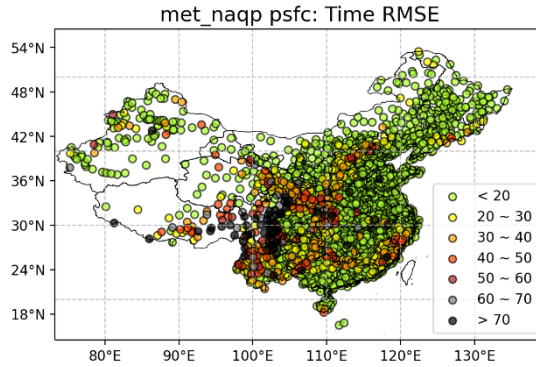

125

126 **Fig. S6** Spatial distribution of hourly evaluation metrics for surface pressure simulated by the WRF  
 127 model across China from 1 to 31 January 2021.

128 **S2.2 April**

129 As shown in Fig. S7, the WRF model generally captures the diurnal variation of  
 130 2 m temperature across most regions of China in April 2021 ( $R > 0.7$ ). Overall,  
 131 simulations were biased low in Southwest and Northwest China, with MB below  $-1\text{ }^{\circ}\text{C}$   
 132 and relatively large fluctuations, and RMSE exceeding  $6\text{ }^{\circ}\text{C}$  in some areas; in South  
 133 China, temperatures were overestimated ( $1 < \text{MB} < 3\text{ }^{\circ}\text{C}$ ) with smaller variability  
 134 (RMSE between 3 and  $4\text{ }^{\circ}\text{C}$ ). Only a few stations in other regions exhibited substantial  
 135 temperature deviations.

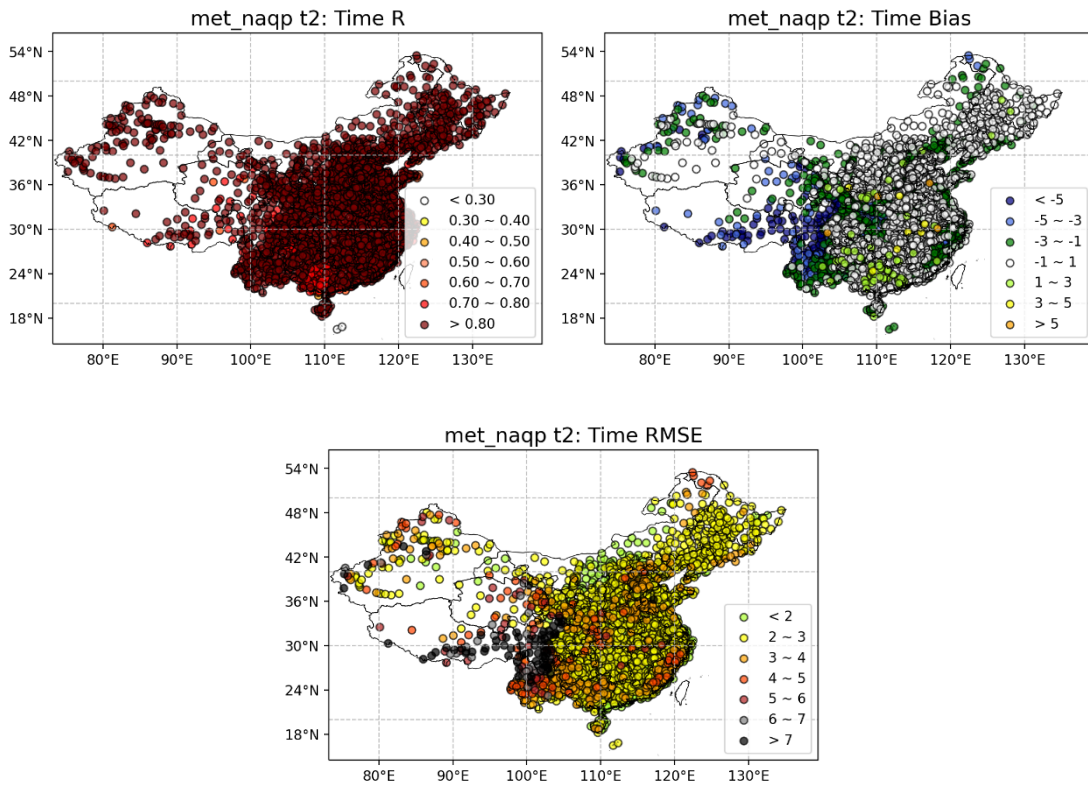

136

137

138 **Fig. S7** Spatial distribution of hourly evaluation metrics for 2 m temperature simulated by the WRF  
 139 model across China from 1 to 30 April 2021.

140 As shown in Fig. S8, the WRF model reasonably reproduces the diurnal variation

141 of 2 m relative humidity across most regions of China in April 2021 ( $R > 0.7$ ). Overall,  
 142 performance was poorer in Southwest, Northwest, and Northeast China. In the  
 143 Southwest, 2 m humidity was overestimated with large variability ( $MB > 15\%$ ,  
 144  $RMSE > 23\%$ ). In the Northwest, results were polarized due to complex terrain, with  
 145 underestimation in western Gansu and overestimation in northern Xinjiang. In the  
 146 Northeast, humidity was generally underestimated, while coastal provinces exhibited  
 147 overestimation.

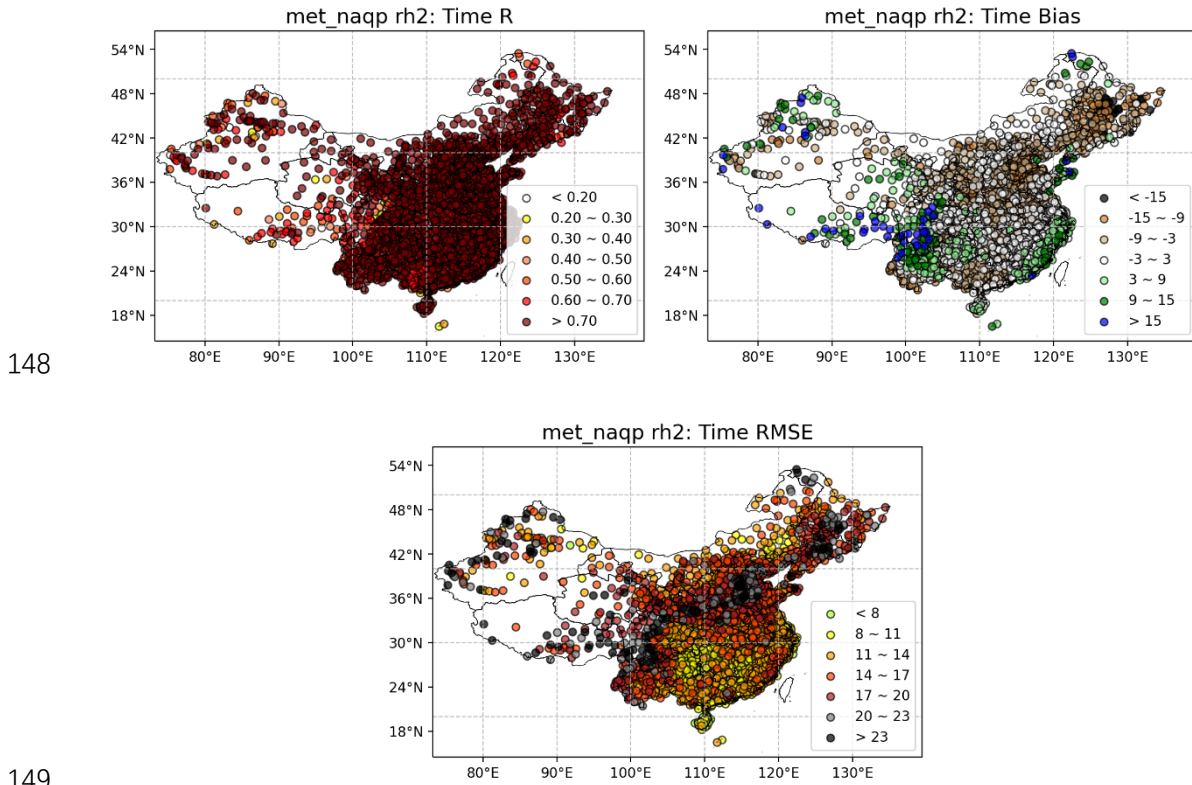

150 **Fig. S8** Spatial distribution of hourly evaluation metrics for 2 m relative humidity simulated by  
 151 WRF across China from 1 to 30 April 2021.

152 As shown in Fig. S9, the WRF model reproduces the diurnal variations of 10 m  
 153 wind speed across most regions of China in April 2021, with deviations primarily  
 154 manifesting as overestimations. Overall, RMSE remains below 8 m/s, indicating  
 155 relatively small variability and good consistency in the wind speed simulation  
 156 nationwide.

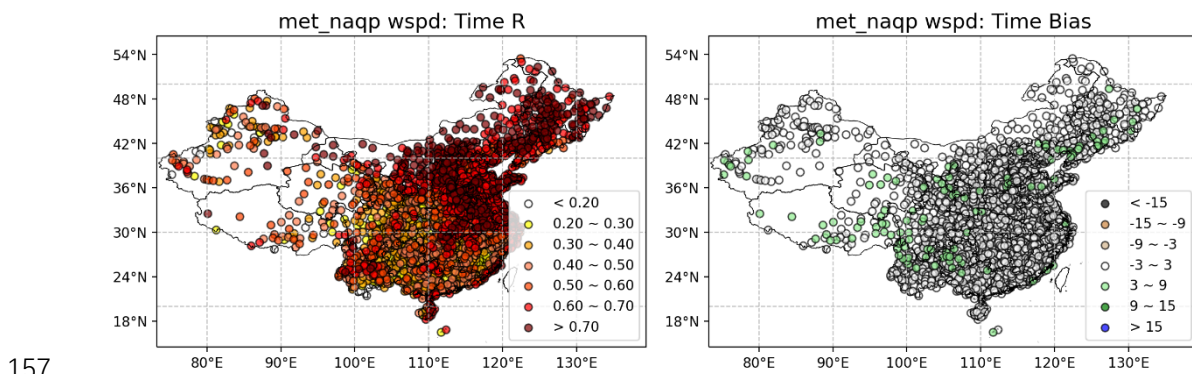

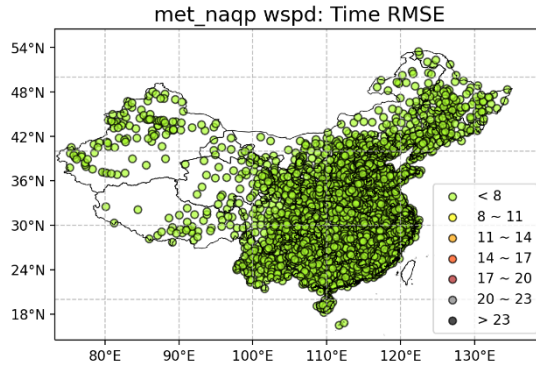

158

159 **Fig. S9** Spatial distribution of hourly evaluation metrics for 10 m wind speed simulated by WRF  
 160 across China from 1 to 30 April 2021.

161 As shown in Fig. S10, the WRF model generally reproduces 10 m wind direction  
 162 poorly across China, with R performing relatively well only in most areas of the  
 163 Beijing-Tianjin-Hebei region, Central China, South China, and at some other stations.

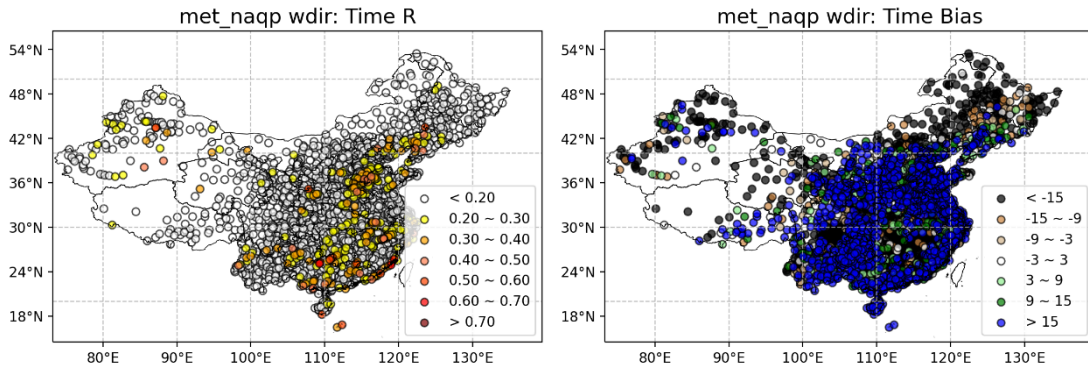

164

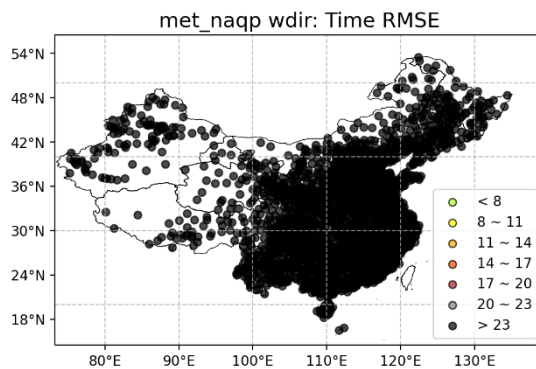

165

166 **Fig. S10** Spatial distribution of hourly evaluation metrics for 10 m wind direction simulated by  
 167 WRF across China from 1 to 30 April 2021.

168 As shown in Fig. S11, the WRF model reproduces the precipitation patterns across  
 169 most regions of China in April 2021 ( $R > 0.4$ ), although performance is relatively poor  
 170 at some stations in Southwest and Northwest China.

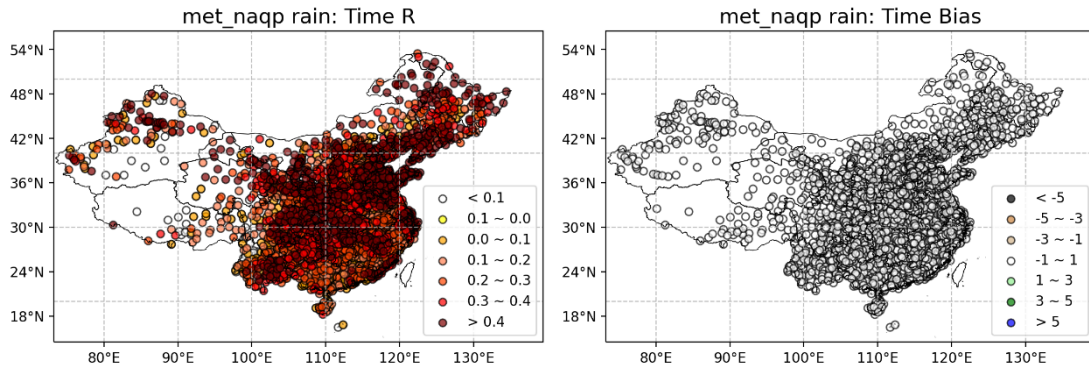

171

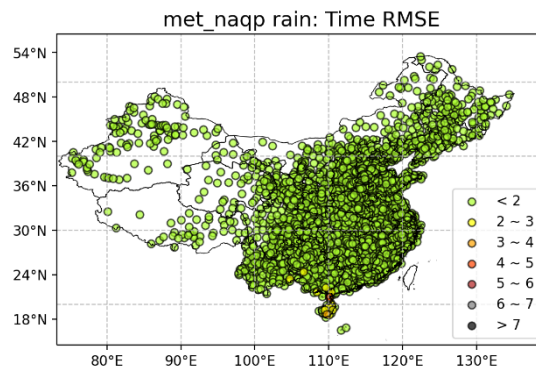

172

173 **Fig. S11** Spatial distribution of hourly evaluation metrics for precipitation simulated by WRF across  
 174 China from 1 to 30 April 2021.

175 As shown in Fig. S12, the WRF model reproduces the diurnal variations of surface  
 176 pressure across China ( $R > 0.7$ ). Overall, simulated values are lower and more variable  
 177 in parts of Southwest and Central China (mean bias  $< 20$  hPa), whereas over Guizhou  
 178 and Chongqing, the simulation tends to be higher.

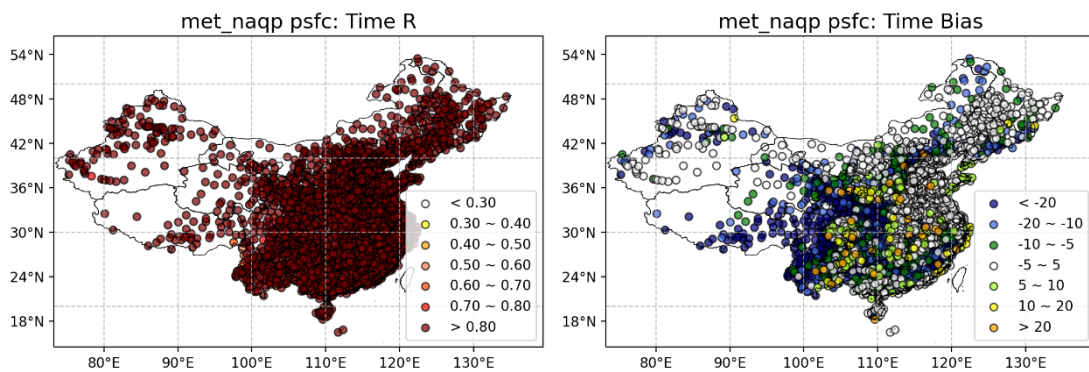

179

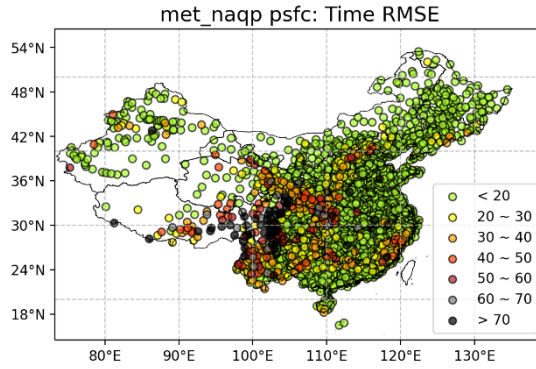

180

181 **Fig. S12** Spatial distribution of hourly evaluation metrics for surface pressure simulated by WRF  
 182 across China from 1 to 30 April 2021.

183 **S2.3 July**

184 As shown in Fig. S13, the WRF model reproduces the diurnal variations of 2 m  
 185 temperature across most regions of China in July 2021 ( $R > 0.7$ ). In Northeast China,  
 186 simulated values deviate by 1-3 °C, with inland areas overestimated and coastal areas  
 187 underestimated; overall, North China and Xinjiang are overestimated. In the  
 188 southeastern coastal regions of East China, temperatures are generally underestimated  
 189 with larger variability (MB: -3 to -1 °C, RMSE: 4-5 °C). The largest deviations occur  
 190 in Southwest China, where temperatures are underestimated by more than 3 °C and  
 191 RMSE exceeds 5 °C.

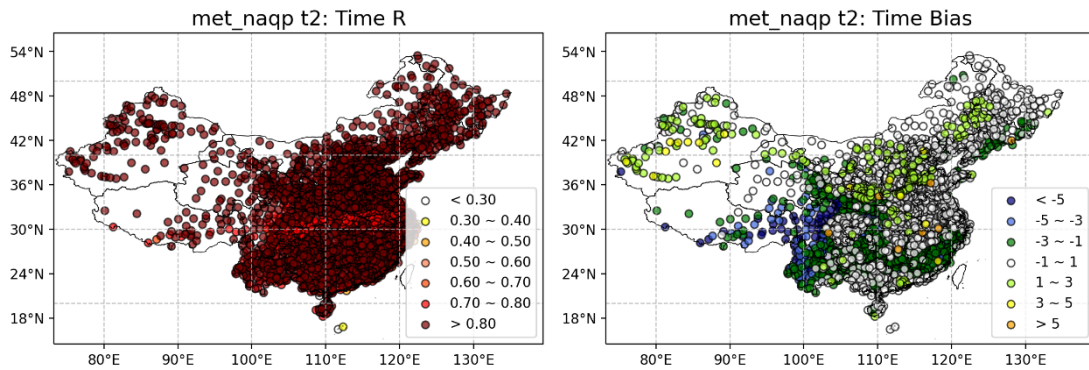

192

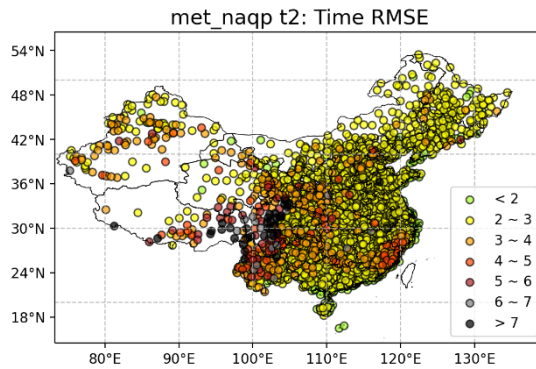

193

194 **Fig. S13** Spatial distribution of hourly evaluation metrics for 2 m temperature simulated by WRF  
 195 across China from 1 to 31 July 2021.

196 As shown in Fig. S14, the WRF model reproduces the diurnal variations of 2 m  
 197 relative humidity across most regions of China in July 2021 ( $R > 0.7$ ). Deviations  
 198 mainly occur in Southwest, Northwest, and Northeast China: humidity is generally  
 199 overestimated in the Southwest with large fluctuations ( $MB > 9\%$ ,  $RMSE > 11\%$ ); the  
 200 Northwest is mostly underestimated, particularly in Xinjiang; and most of Northeast  
 201 China is underestimated. In addition, coastal regions generally exhibit overestimation  
 202 of humidity.

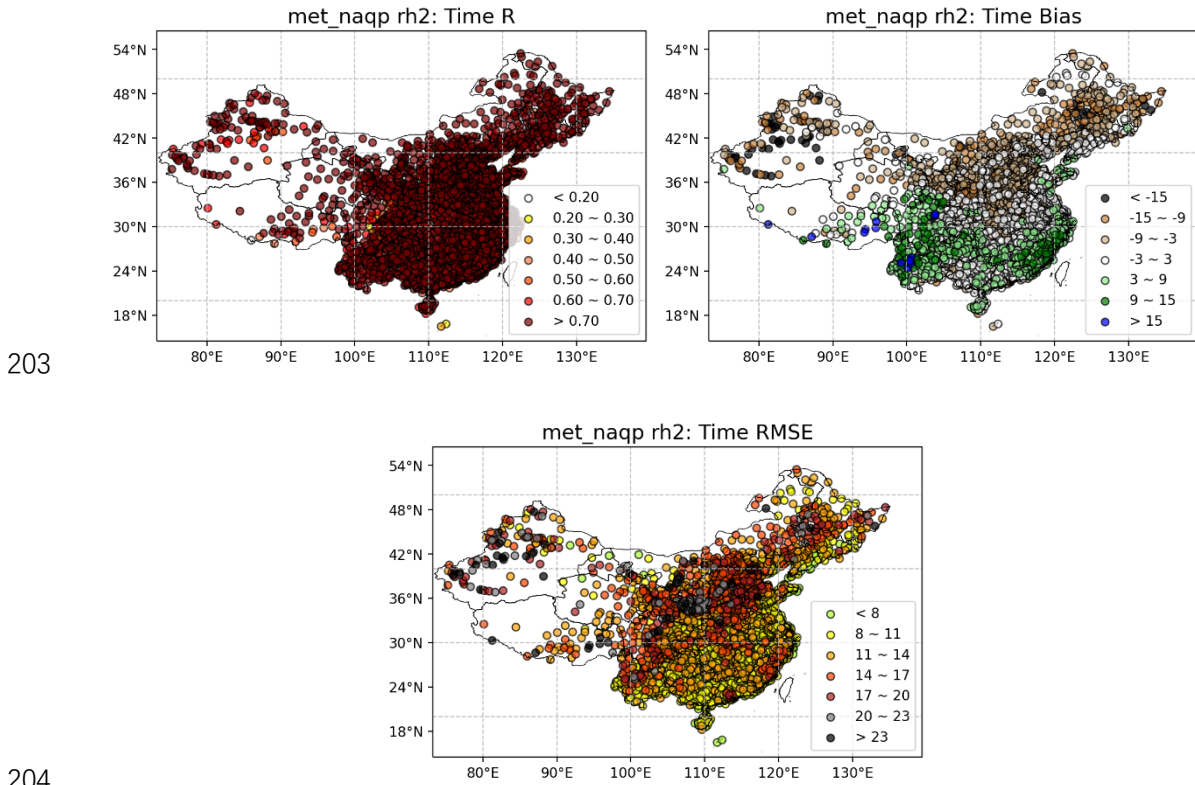

205 **Fig. S14** Spatial distribution of hourly evaluation metrics for 2 m relative humidity simulated by  
 206 WRF across China from 1 to 31 July 2021.

207 As shown in Fig. S15, the WRF model reproduces the diurnal variations of 10 m  
 208 wind speed across most regions of China in July 2021, with larger deviations mainly  
 209 manifesting as overestimation; poorer performance is observed in the Sichuan Basin,  
 210 Tibet, and parts of Xinjiang. Overall, the RMSE of wind speed is generally below 8 m/s,  
 211 indicating small fluctuations and good spatial consistency in the simulations.

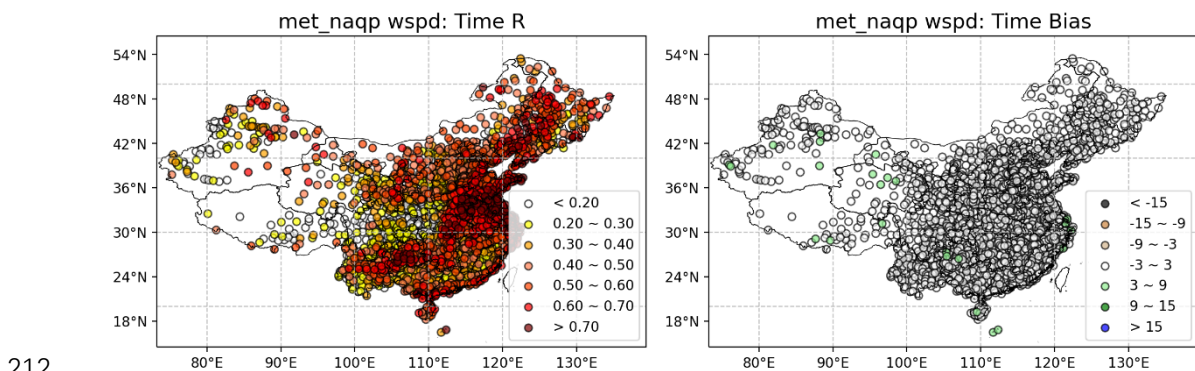

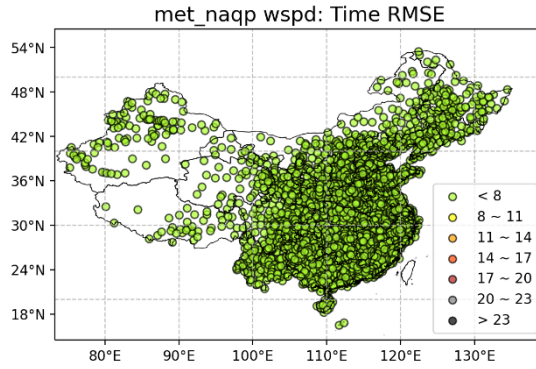

213

214 **Fig. S15** Spatial distribution of hourly evaluation metrics for 10 m wind speed simulated by WRF  
 215 across China from 1 to 31 July 2021.

216 As shown in Fig. S16, the WRF simulation of 10 m wind direction generally  
 217 reproduces the observed patterns poorly, with low correlations across most regions of  
 218 China, except for moderate performance in parts of the Beijing-Tianjin-Hebei region,  
 219 East China, Central China, South China, and a few isolated stations.

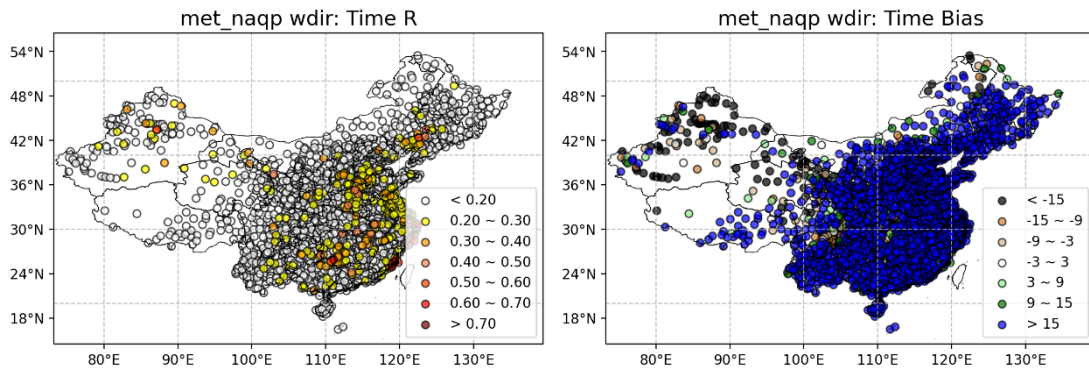

220

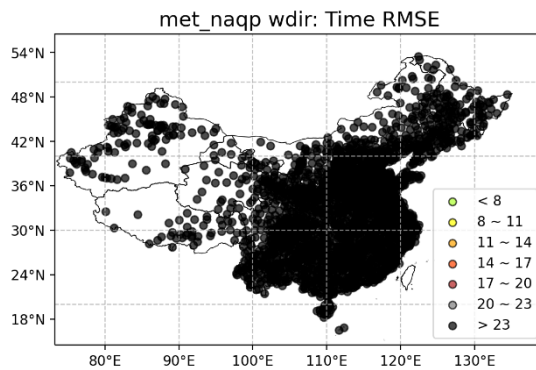

221

222 **Fig. S16** Spatial distribution of hourly evaluation metrics for 10 m wind direction simulated by WRF  
 223 across China from 1 to 31 July 2021.

224 As shown in Fig. S17, the WRF model reproduces the precipitation patterns in  
 225 July 2021 relatively well mainly in the Beijing-Tianjin-Hebei region ( $R > 0.4$ ), while  
 226 correlations in other regions are generally poor, with only a few stations exhibiting R  
 227 values above 0.4.

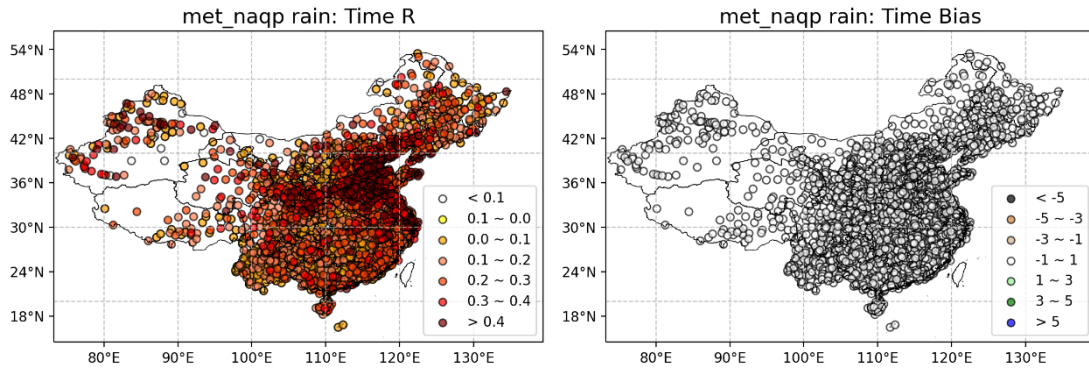

228

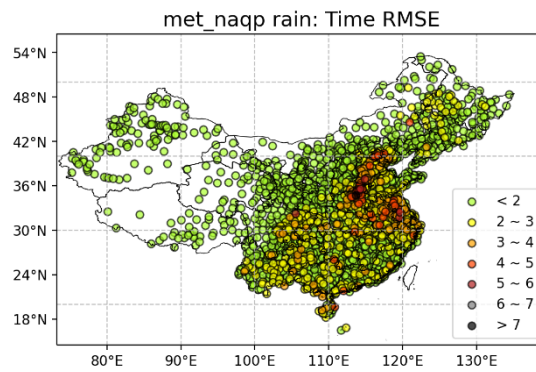

229

230 **Fig. S17** Spatial distribution of hourly evaluation metrics for precipitation simulated by WRF across  
 231 China from 1 to 31 July 2021.

232 As shown in Fig. S18, the WRF model reproduces the diurnal variations of surface  
 233 pressure across China well ( $R > 0.7$ ); however, simulated values are lower and more  
 234 variable in parts of Southwest and Central China (mean bias  $< 20$  hPa), whereas slight  
 235 overestimations are observed in the Guizhou and Chongqing regions.

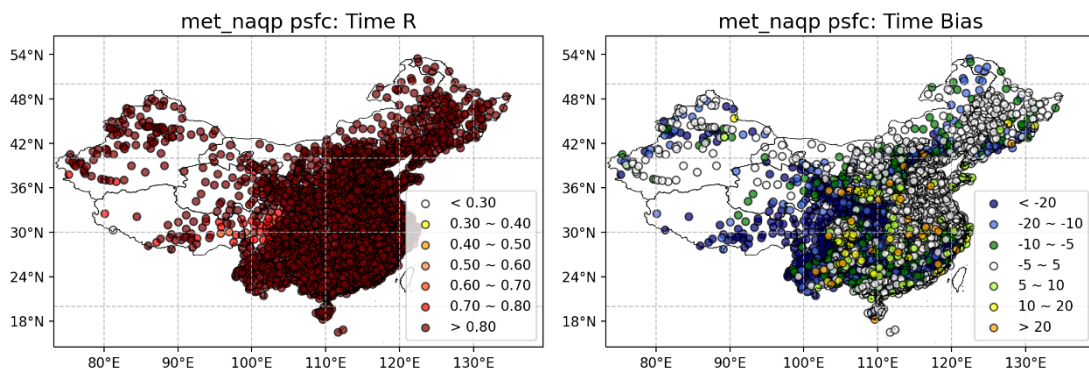

236

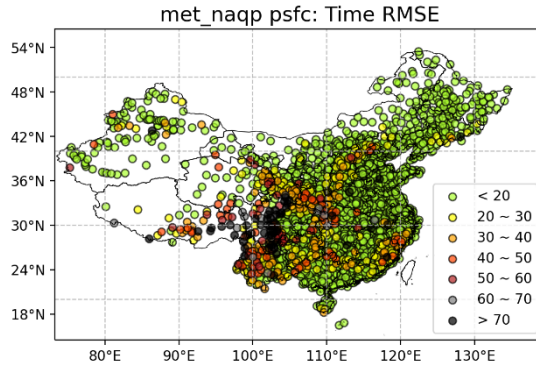

237

238 **Fig. S18** Spatial distribution of hourly evaluation metrics for surface pressure simulated by WRF  
 239 across China from 1 to 31 July 2021.

240 **S2.4 October**

241 As shown in Fig. S19, the current WRF simulation reproduces the diurnal  
 242 variations of 2 m temperature in October 2021 well ( $R > 0.7$ ); simulated values are  
 243 slightly overestimated in southern North China (1-3 °C) and underestimated along the  
 244 East China coast (1-3 °C); the Southwest region exhibits poorer performance, with  
 245 temperatures generally underestimated by more than 3 °C and larger variability  
 246 (RMSE > 7 °C).

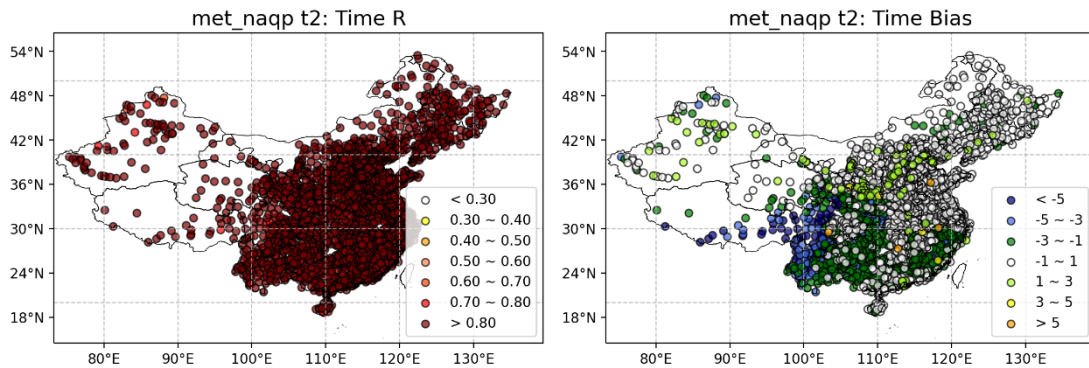

247

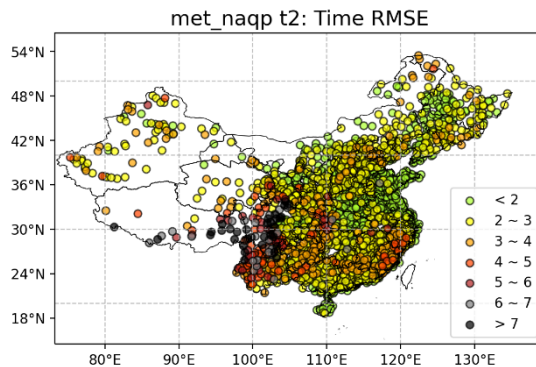

248

249 **Fig. S19** Spatial distribution of hourly evaluation metrics for 2 m temperature simulated by WRF  
 250 across China from 1 to 31 October 2021.

251 As shown in Fig. S20, the WRF model reproduces the diurnal variation of 2 m  
 252 relative humidity across most regions of China in October 2021 ( $R > 0.7$ ). Overall,

253 humidity is overestimated in Southwest China, with MB exceeding 15% and relatively  
 254 large fluctuations (RMSE > 17%). In East and South China, the simulation slightly  
 255 overestimates humidity with smaller variability, whereas most areas in Central, North,  
 256 Northeast, and Northwest China show underestimation.

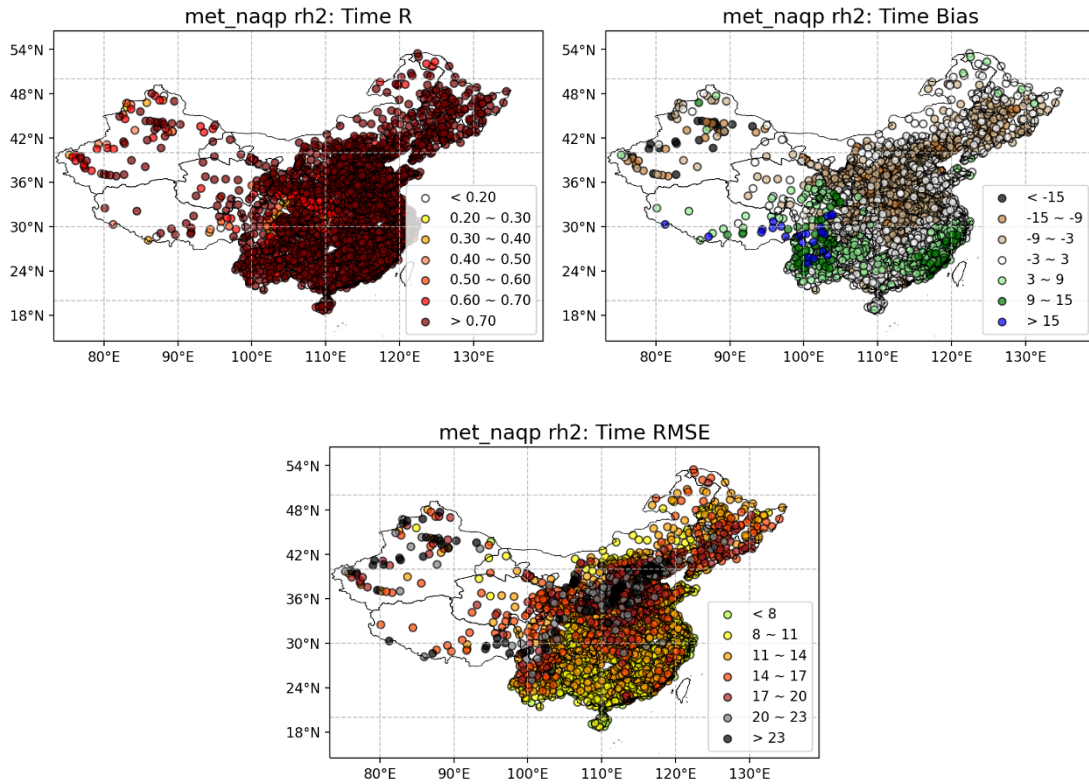

257

258

259 **Fig. S20** Spatial distribution of hourly evaluation metrics for 2 m relative humidity simulated by  
 260 WRF across China from 1 to 31 October 2021.

261 As shown in Fig. S21, the WRF model reproduces the diurnal variation of 10 m  
 262 wind speed across most regions of China, except for certain areas in the Sichuan Basin,  
 263 Xinjiang, and Yunnan. When deviations are relatively large, wind speed is generally  
 264 overestimated. RMSE values are below 8 m/s nationwide, indicating small variability  
 265 and good consistency of wind speed simulations across the country.

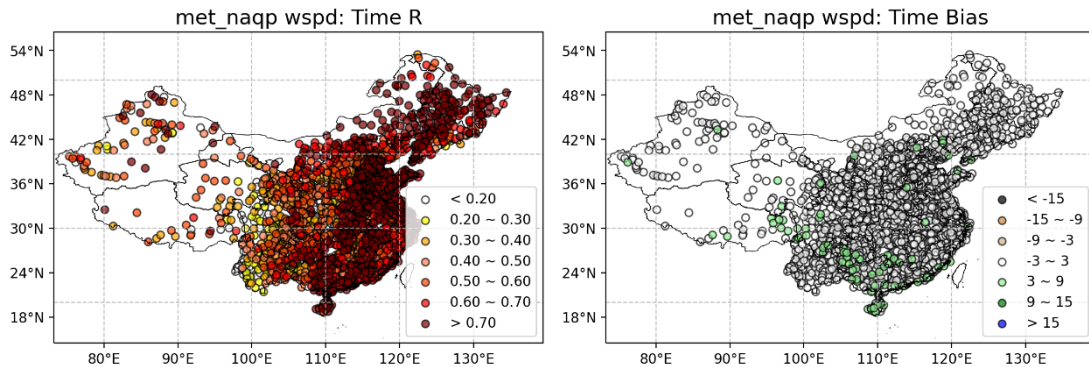

266

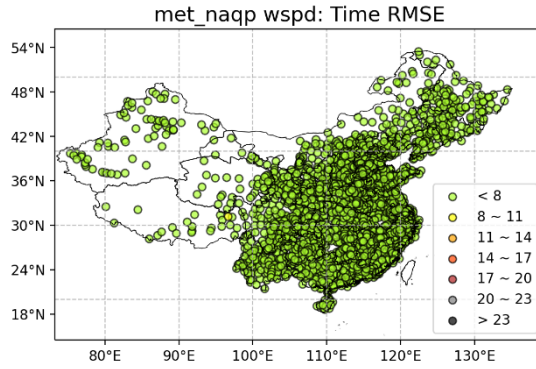

267

268 **Fig. S21** Spatial distribution of hourly evaluation metrics for 10 m wind speed simulated by WRF  
 269 across China from 1 to 31 October 2021.

270 As shown in Fig. S22, the WRF model generally performs poorly in simulating  
 271 10 m wind direction across China, although better agreement is observed in coastal  
 272 provinces, most areas of the Beijing-Tianjin-Hebei region, and selected sites in Yunnan,  
 273 Guizhou, and Xinjiang.

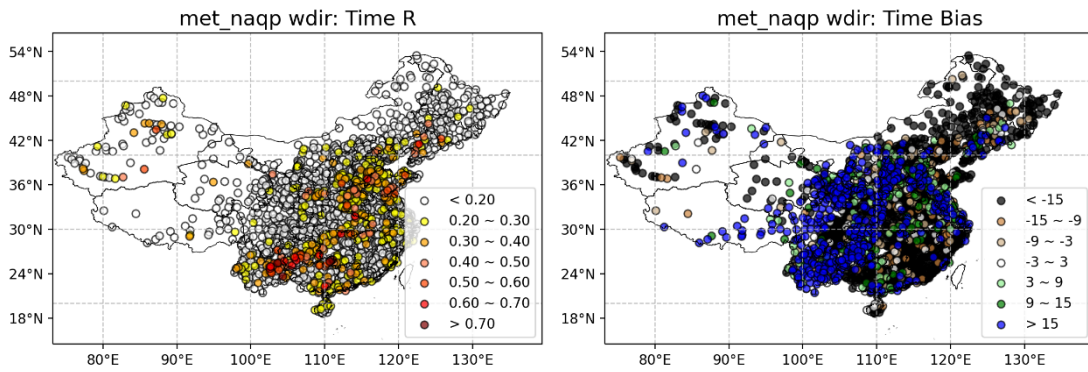

274

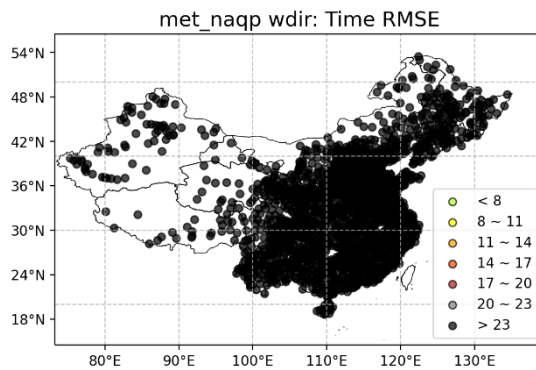

275

276 **Fig. S22** Spatial distribution of hourly evaluation metrics for 10 m wind direction simulated by WRF  
 277 across China from 1 to 31 October 2021.

278 As shown in Fig. S23, the WRF model reproduces the precipitation process well  
 279 across most regions of China in October 2021 ( $R > 0.4$ ), with poorer performance  
 280 observed only in parts of Southwest, Northwest, and South China.

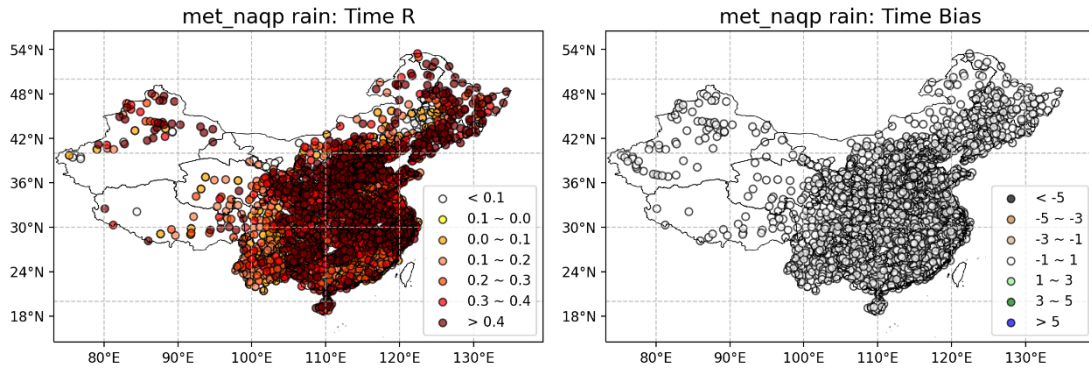

281

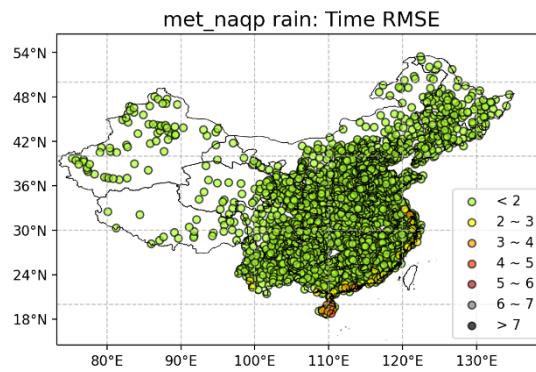

282

283 **Fig. S23** Spatial distribution of hourly evaluation metrics for precipitation simulated by WRF across  
 284 China from 1 to 31 October 2021.

285 As shown in Fig. S24, the WRF model reproduces the diurnal variation of surface  
 286 pressure well across China in October 2021 ( $R > 0.7$ ). Overall, simulated pressure is  
 287 underestimated with relatively large fluctuations in parts of Southwest and Central  
 288 China ( $MB < 20$  hPa), whereas overestimation is observed in regions such as Guizhou  
 289 and Chongqing.

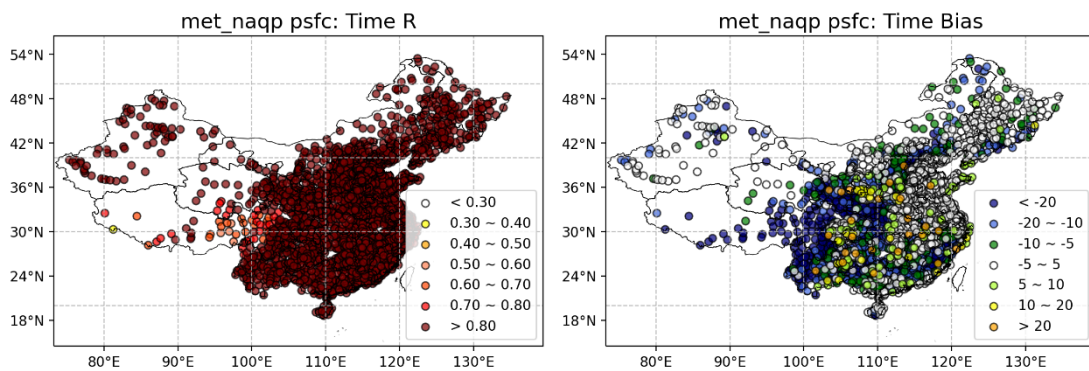

290

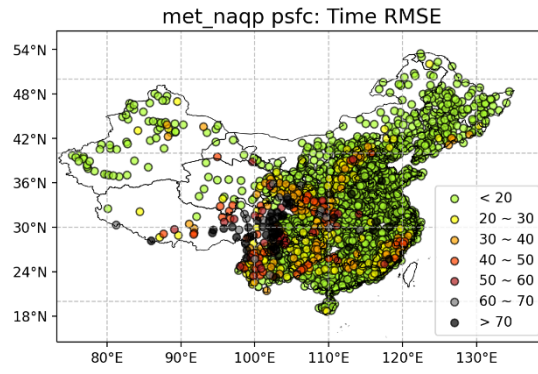

291

292 **Fig. S24** Spatial distribution of hourly evaluation metrics for surface pressure simulated by WRF  
293 across China from 1 to 31 October 2021.

294

295 **S3 Distribution of 1,644 National Control Stations**

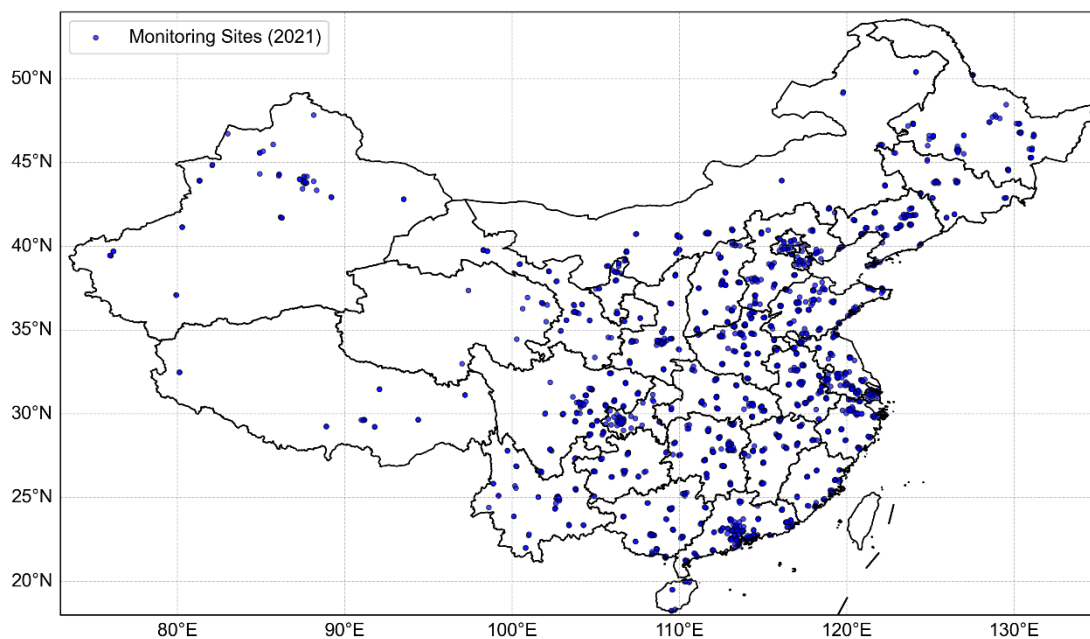

296  
297  
298  
299

**Fig. S25** Spatial distribution of the 1,644 national control monitoring stations across China in 2021, based on data from the China National Environmental Monitoring Center (CNEMC).

300 **S4 Air Quality Index (AQI) and Individual Air Quality Index (IAQI)**

301 **S4.1 Definition**

302 **AQI (Air Quality Index):** A standardized index used to communicate overall air  
303 quality to the public. It integrates multiple pollutant concentrations to reflect the  
304 potential health risks associated with air pollution.

305 **IAQI (Individual Air Quality Index):** Represents the contribution of a single  
306 pollutant to the overall AQI. It is calculated based on the observed concentration of the  
307 pollutant and the breakpoint concentrations defined in the air quality standards.

308 **S4.2 Calculation**

309 **IAQI for pollutant  $i$ :**

310 
$$IAQI_i = \frac{IAQI_{Hi} - IAQI_{Lo}}{C_{Hi} - C_{Lo}} \times (C_i - C_{Lo}) + IAQI_{Lo} \quad (S7)$$

311 In the formula,  $C_i$  is the observed concentration of pollutant  $i$ .  $C_{Hi}$  and  $C_{Lo}$  are the  
312 upper and lower breakpoint concentrations corresponding to  $C_i$ .  $IAQI_{Hi}$  and  $IAQI_{Lo}$  are  
313 the IAQI values corresponding to  $C_{Hi}$  and  $C_{Lo}$ .

314 **AQI:**

315 
$$AQI = \max(IAQI_1, IAQI_2, \dots, IAQI_n) \quad (S8)$$

316 That is, the AQI is equal to the maximum IAQI among all monitored pollutants.

317

318 **S5 Hit Rate, False Alarm Rate, and the Distance from the Random**  
319 **Operating Characteristic (DROC)**

320 In the evaluation of graded air quality forecasts, we adopt Hit Rate, False Alarm  
321 Rate, and the distance from the random operating characteristic (DROC) as verification  
322 metrics. Their definitions and formulas are as follows:

323 **S5.1 Hit Rate**

324 Definition: The proportion of observed pollution categories that are correctly  
325 forecasted by the model.

326 Formula:

327 
$$Hit\ Rate = \frac{Hits}{Hits + Misses} \quad (S9)$$

328 Where *Hits* refers to the number of cases where the model prediction matches the  
329 observation, and *Misses* denotes the cases that were observed but not predicted.

330 **S5.2 False Alarm Rate**

331 Definition: The proportion of pollution categories that were forecasted by the  
332 model but did not occur in the observations.

333 Formula:

334 
$$False\ Alarm\ Rate = \frac{FalseAlarms}{Hits + FalseAlarms} \quad (S10)$$

335 Where *FalseAlarms* refers to the number of cases that were forecasted but not  
336 observed.

337 **S5.3 The Distance from the Random Operating Characteristic (DROC)**

338 Definition: DROC measures the distance of forecast-observation points from the  
339 diagonal in the scatter plot of observed versus predicted pollution events. A larger  
340 distance indicates higher forecasting skill. It combines hit rate and false alarm rate to  
341 evaluate overall performance.

342 Formula:

343 
$$DROC = \frac{Hit\ Rate - False\ Alarm\ Rate}{\sqrt{2}} \quad (S11)$$

344

345 **Reference**

346 Willmott, C.J., 1981. ON THE VALIDATION OF MODELS. *Phys. Geogr.* 2, 184-194.

347 <https://doi.org/10.1080/02723646.1981.10642213>

348
